# Supplementary material
Source: HighWire-hosted journal article supplement (https://www.rsfjournal.org/highwire/filestream/3305/field_highwire_adjunct_files/0/VanHeuvelen_onlineappendix.pdf)
Supplement: VanHeuvelen_onlineappendix.pdf [file VanHeuvelen_onlineappendix.pdf]

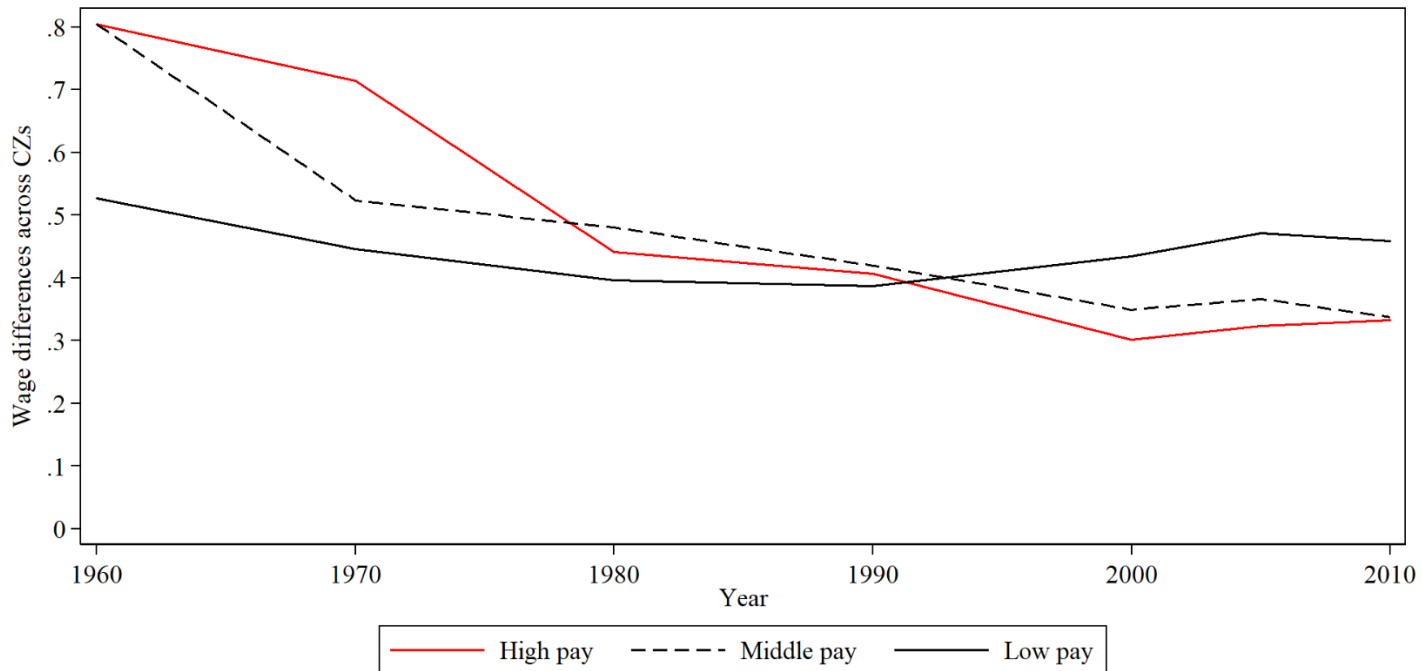

**Appendix Figure 1: Replication of Figure 4, cost of living adjusted**

Note: Figure replicates top-left panel of Figure 4, showing maximum wage gap of local wage percentiles across CZs. All Figures and Tables have been replicated using cost-of-living adjusted wages, and we reach the same substantive conclusions.
